# Supplementary material
Source: PubMed Central journal article supplement (PMC2788871)
Supplement: supp_M109.031997_jbc.M109.031997-1.pdf [file supp_M109.031997_jbc.M109.031997-1.pdf]

### Supplementary Material:

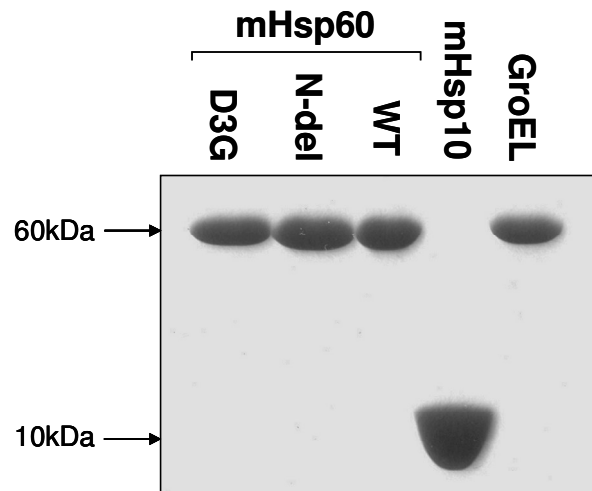

FIGURE 1S. **SDS-PAGE of the various proteins used in this study.** 10  $\mu$ g of each protein were analyzed by SDS-PAGE and then stained with Coomassie Brilliant Blue.

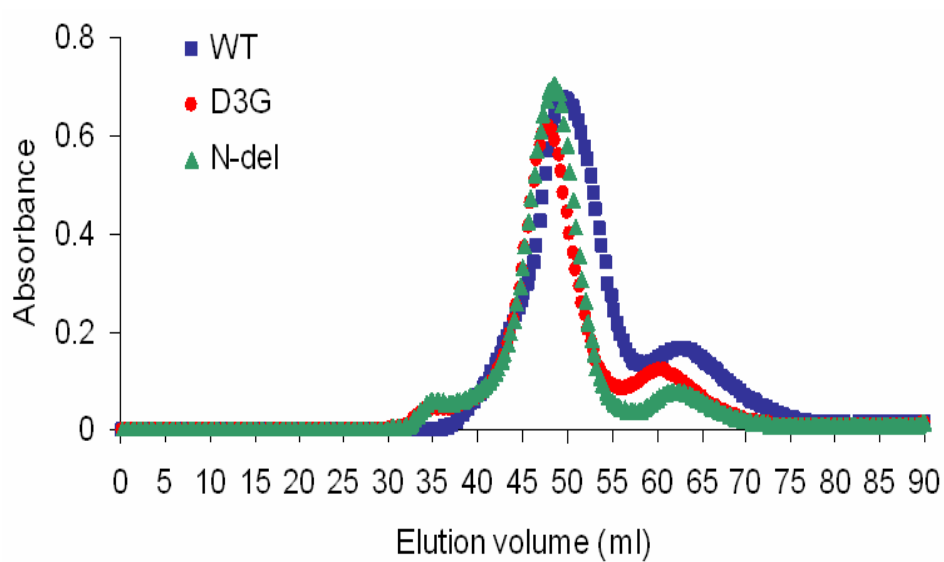

FIGURE 2S. **Gel-filtration chromatography of mHsp60 variants.** The elution pattern of mHsp60 variants from a gel-filtration column following reconstitution of the oligomers as described before (*1*).

**A**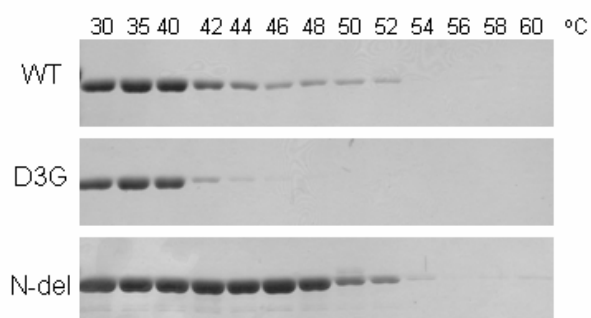**B**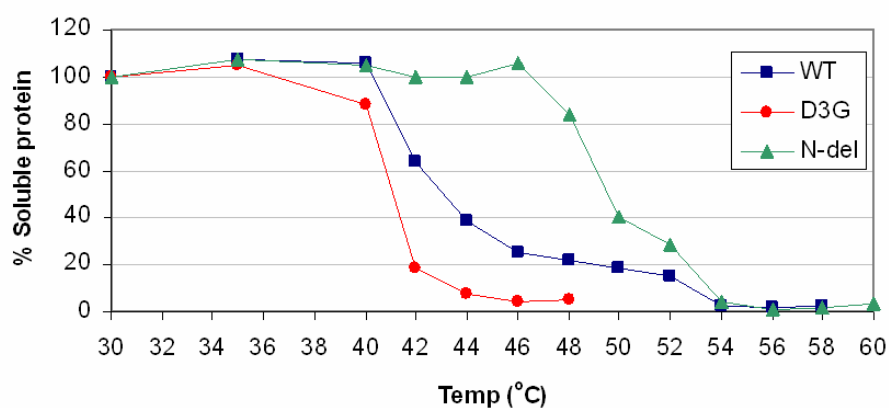

**FIGURE 3S. Thermal stability of mHsp60 variants.** **A**, Samples of 5  $\mu$ M of wild-type and mHsp60 mutants in 50 mM Na-HEPES (pH 7.5), 50 mM KCl and 20 mM  $MgCl_2$  were incubated for 20 minutes at the indicated temperatures and then centrifuged at 14,000 rpm for 15 min at room temperature. 5  $\mu$ l aliquots from supernatant fractions were analyzed by SDS-PAGE and then stained with Coomassie Brilliant Blue. **B**, Quantitative presentation of the results in panel A. Densitometric analysis was carried out using ImageMaster 1D Prime software. 100% is the amount of soluble protein at 30 °C.

**A**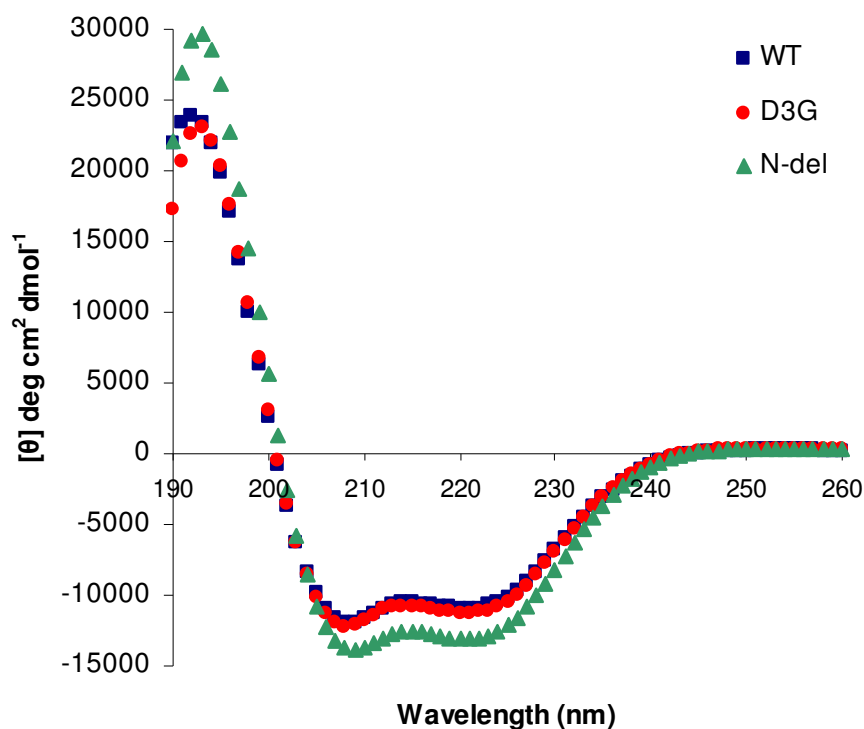**B**

|                     | <b>WT</b> | <b>D3G</b> | <b>N-del</b> |
|---------------------|-----------|------------|--------------|
| <b>Helix</b>        | 34.7 %    | 35.6 %     | 42.1 %       |
| <b>Antiparallel</b> | 7.9 %     | 7.6 %      | 6.2 %        |
| <b>Parallel</b>     | 8.4 %     | 8.2 %      | 6.9 %        |
| <b>Beta-Turn</b>    | 16.6 %    | 16.4 %     | 15.4 %       |
| <b>Rndm. Coil</b>   | 32.2 %    | 31.6 %     | 27.7 %       |
| <b>Total Sum</b>    | 99.7 %    | 99.4 %     | 98.4 %       |

**FIGURE 4S. Circular dichroism analysis of mHsp60 variants.** **A**, CD spectra of mHsp60 variants (2 mg/ml), measured at 25 °C in 10 mM Tris (pH 7.7), 10 mM KCl and 5 mM MgCl<sub>2</sub> over the range of 190-260 nm at a scan rate of 1 nm/sec. A cell with 0.1 mm path length was used. All measurements were done with an Aviv CD spectrometer model 202. Each spectrum is an average of 5 scans. The raw data were corrected by subtracting the contribution of the buffer to the signal. Then data were smoothed and converted to molar ellipticity units. **B**, Deconvolution of the results in panel A using CDNN program Version 2 (2).

## REFERENCES

1. Viitanen, P. V., Lorimer, G., Bergmeier, W., Weiss, C., Kessel, M., and Goloubinoff, P. (1998) Purification of mammalian mitochondrial chaperonin 60 through in vitro reconstitution of active oligomers, *Methods Enzymol.* 290, 203-217.
2. <http://www.photophysics.com/cdnn.php>
